# Supplementary material for: The Effect of Neural Noise on Spike Time Precision in a Detailed CA3 Neuron Model
Source: Hindawi journal article supplement (doi:10.1155/2012/595398), 2012-01-01
Supplement: f1 [file 595398.f1.docx]

|  | |  | |  | | | | | | Value | | Other parameters (comments) | | | |
| --- | --- | --- | --- | --- | --- | --- | --- | --- | --- | --- | --- | --- | --- | --- | --- |
| Resting membrane potential | | *Vrest* | |  | | | | | | -60 mV | | [45, 46] | | | |
| Simulation time steps | | *t* | | -fast axonal voltage-gated channels Na and K(DR)  -slow somato-dendritic (SD) voltage-gated channels Na, K(DR), K(AHP), K(A), K(C), Ca  -synapses, membrane and other compartments | | | | | | 1 µs [52]  10 µs  10 µs | | The voltage attenuation along the dendritic tree was 3-fold for DC input and 15 fold for the synaptic input, both applied to the apical dendrites and measured at soma. | | | |
| Pre-synaptic neurons | | *N* | | total number of pre-synaptic neurons | | | | | | 1100  (110, 11000) | | To model different levels of synchrony of pre-synaptic neurons, the *N* value was varied. | | | |
| Arrangement of synaptic input | | | | | soma-dendritic (SD) regions driven by various groups of pre-synaptic neurons (spike generators):  **dendrites:**  (1) apical_1 glutamatergic (AMPA, NMDA)  (2) apical_2 glutamatergic (AMPA, NMDA)  (3) basal glutamatergic (AMPA, NMDA)  (4) apical GABAergic, slow (GABAB)  (5) apical_1 GABAergic, fast (GABAA)  (6) apical_2 GABAergic, fast (GABAA)  (7) basal GABAergic, slow (GABAB)  (8) basal GABAergic, fast (GABAA)  **somatic:**  (9) glutamatergic (AMPA, NMDA)  (10) GABAergic, fast (GABAA)  (11) GABAergic, slow (GABAB) | | | | | No. of neurons (spike generators) within different groups of pre-synaptic neurons | | Driving frequency and refractory periods of groups of pre-synaptic neurons in question  *frequency* r*efractory period*  [Hz] [ms] | | | |
| 100 (10, 1000)  100 (10, 1000)  100 (10, 1000)  100 (10, 1000)  100 (10, 1000)  100 (10, 1000)  100 (10, 1000)  100 (10, 1000)  100 (10, 1000)  100 (10, 1000)  100 (10, 1000) | | 10 [43, 46]  10  10  40 [76]  8 [76]  30 [76]  40  30  10  30  40 | | | 3  3  3  30  3  3  30  3  3  3  30 |
| Synaptic spatial distributions and densities | **Description of the scheme.** From the location of the highest synaptic density *Dsyn* separated by the *Lsyn* distance from the soma, the density of various types of synapses decreases outwardly according to the Gaussian distribution of the standard deviations *Syn*. This is shown in the scheme above, drawn by different Gaussians (left for inhibition, right for excitation) determining synaptic distribution. | | | | | | | | | *Dsyn* [/m2] - peak density of synapses  *Lsyn* [m] – distance separating the location of peak synaptic density and the location of the soma  *Syn*[m] – standard deviation of synaptic density distribution aligned along dendrites according to the Gaussian distribution | | | | | |
| -all synapses  - AMPA synapses    - NMDA synapses  (modeled as voltage dependent)  - GABAA synapses    - GABAB synapses | | | | | | Number of synaptic contacts [45] | Parameters of spatial synaptic distributions along dendrites and soma for different types of synapses. Gaussians with listed parameters are drawn in the scheme above. (*D* stands for *Dsyn*, *L* stands for *Lsyn* and *std* stands for *Syn*).  **basal** *(D, L, std)*; **apical_1***(D, L, std)*; **apical_2** *(D, L, std)*; **soma** *(D)*  (15e10, 8e-5, 5e-5); (10e10, 10e-5, 6e-5); (15e10, 25e-5, 9e-5); (3e10)  - the same distribution as for AMPA  (4e10, 2e-5, 3e-5); (5e10, 5e-5, 9e-5); (3e10 20e-5 6e-5); (5e10)  (0, 0, 0); (2e10, 20e-5, 6e-5); (0) | | | | | | | |
| 7874  3453  3453  809  159 |
| Synaptic parameters and constants | type of synapse | | | | | time constants [ms]  *τ1*, *τ2* | | | *gmax* [Siemens] | *CV* of *gmax* | *Satgmax*  [Siemens] | | *Esyn* [mV]  (absolute value) | | |
| AMPA  NMDA  GABAA  GABAB | | | | | 1, 0.5 [43]  80, 0.67 [43]  7.5, 1.5 [48, 76]  170, 500 [46] | | | 5e-10 [65]  1e-10 [47]  5e-10 [43]  1e-10 [50] | 0.42 [65]  0.65 [65, 67]  0.42 [66]  0.42 [66] | 15e-10 [65]  3e-10 [49]  15e-10 [49]  5e-10 [66] | | 0 [46]  0 [46]  -75 [43, 46]  -75 [46] | | |
| Voltage-gated conductances | HH channel type | | gate configuration | | | transition rates  forward (α) [s‑1] [46] | | | | transition rates  backward (β) [s-1] [46] | | | | single channel  conductance [pS] | |
| **SD membrane:**  Na activation (m)  Na inactivation (h)  Ca (s)  K(DR) (n)  K(AHP) (q)  K(A) activation (a)  K(A) inactivation (b)  K(C) (c) [V<50]  K(C) (c) [V>50]  **Axonal membrane**  Na activation (m)  Na inactivation (h)  K(DR) (n) | | | | m2h  s2  n2  q  ab  c  m3h  n4 | 0.32(13.1-V)/(exp((13.1-V)/4)-1)  0.128(exp((17-V)/18))  1.6/(1+exp(-0.072(V-65)))  0.016(35.1-V)/(exp((35.1-V)/5)-1)  min(0.00002[Ca2+], 0.01)  0.02(13.1-V)/(exp((13.1-V)/10)-1)  0.0016exp((-13-V)/18)  exp(((V-10)/11)-((V-6.5)/27))/18.975  2exp(-(V-6.5)/27)  0.8(17.2-V)/(exp((17.2-V)/4)-1)  0.32exp((42-V)/18)  0.03(17.2-V)/(exp((17.2-V)/5)-1) | | | | 0.28(V-40.1)/(exp((V-40.1)/5)-1)  4/(1+exp((40-V)/5))  0.02(V-51.1)/(exp((V-51.1)/5)-1)  0.24exp((20-V)/40)  0.001  0.0175(V-40.1)/(exp((V-40.1)/10)-1)  0.05/(1+exp((10.1-V)/5))  2exp(-(V-6.5)/27)-αc  0  0.7(V-42.2)/(exp((V-42.2)/5)-1)  10/(1+exp((42-V)/5))  0.45exp((12-V)/40) | | | | 15 [52]  14 [51,52]  17 [53,17]  19 [54,55]  6 [56]  15  17 | |
|  | Densities of listed channels along the soma-dendritic membrane are adopted from [46].  Equilibrium potentials (absolute value) of respective ions are VNa=55 mV, VCa=80 mV, VK= -75 mV and -85mV for SD and axonal compartments. | | | | | | | | | | | | | | |
